# Supplementary material for: Tobramycin-mediated self-assembly of DNA nanostructures for targeted treatment of Pseudomonas aeruginosa-infected lung inflammation
Source: Royal Society of Chemistry journal article supplement (doi:10.1039/d3bm02121a), 2024-01-01
Supplement: d3bm02121a1.pdf [file d3bm02121a1.pdf]

# Tobramycin-mediated self-assembly of DNA nanostructures for targeted treatment of *Pseudomonas aeruginosa*-infected lung inflammation

Yuhang Xu,<sup>†a</sup> Qian Liu,<sup>†ab</sup> Bin Wang,<sup>ac</sup> Quan Li,<sup>a</sup> Yue Chen,<sup>a</sup> Yao Yang,<sup>a</sup> Zhihao Zhu,<sup>a</sup> Daohui Gong,<sup>a</sup> Chuan Zhang,<sup>\*d</sup> Guansong Wang,<sup>\*ac</sup> Hang Qian<sup>\*ac</sup>

---

<sup>a</sup> Institute of Respiratory Diseases, Xinqiao Hospital, Third Military Medical University, Chongqing 400037, China. E-mail:

*hqian@tmmu.edu.cn, wanggs@tmmu.edu.cn*

<sup>b</sup> Laboratory of Pharmacy and Chemistry, and Laboratory of Tissue and Cell Biology, Lab Teaching & Management Center, Chongqing Medical University, Chongqing, 400016, China.

<sup>c</sup> Chongqing Key Laboratory of Precision Medicine and Prevention of Major Respiratory Diseases, Chongqing 400037, China

<sup>d</sup> School of Chemistry and Chemical Engineering, Frontiers Science Center for Transformative Molecules, Shanghai Key Laboratory for Molecular Engineering of Chiral Drugs, Shanghai Jiao Tong University, 800 Dongchuan Road, Shanghai 200240, China.

† Electronic Supplementary Information (ESI) available: [details of any supplementary information available should be included here]. See

DOI: 10.1039/x0xx00000x

† These authors contributed equally to this work.

**Keywords:** DNA nanostructures, self-assembly, anti-bacteria, *Pseudomonas aeruginosa* targeting, tobramycin

Table S1: DNA sequences are as follows:

| Strand                                    | Sequence (5' - 3')                                                                                             |
|-------------------------------------------|----------------------------------------------------------------------------------------------------------------|
| M1                                        | GTA GGT TTT TTC TTG CCA GGC ACC ATC GTA GGT TTT TTC TTG CCA GGC ACC ATC GTA GGT<br>TTT TTC TTG CCA GGC ACC ATC |
| M2(maleimide-decorated DNA single strand) | TGA TAA GCT AAA GCA AGC CTA CGA TGG ACA CGG TAA CGA C                                                          |
| M3                                        | ACC GTG TGG TTG CTA GTC GTT                                                                                    |
| M4                                        | TAG CAA CCT GCC TG                                                                                             |

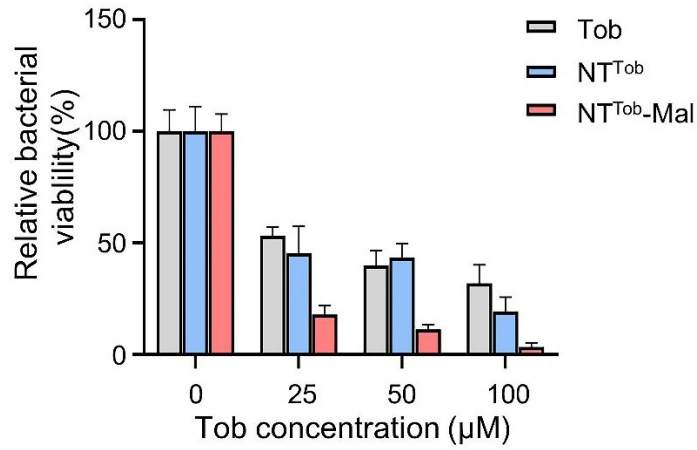

Fig. S1 Quantitative analysis of CFUs on LB agar plates to evaluate the inhibition of *Pseudomonas aeruginosa* growth by Tob, NT<sup>Tob</sup> and NT<sup>Tob</sup>-Mal at different concentrations.

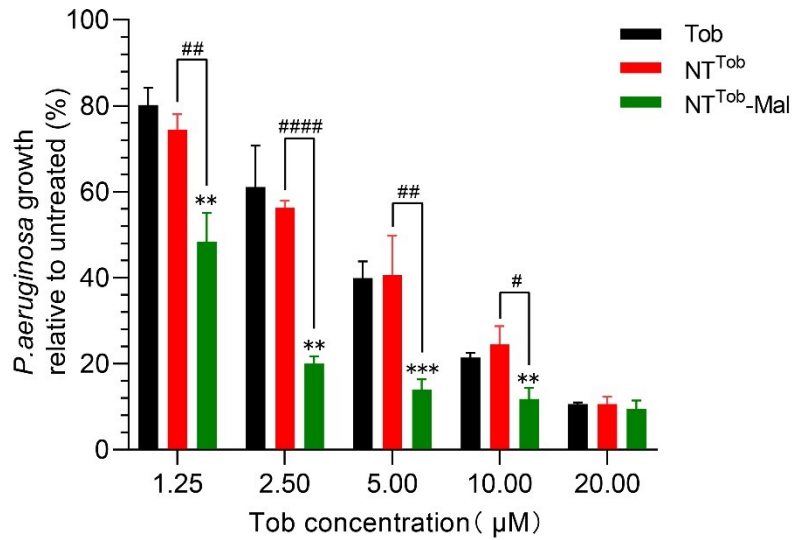

Fig. S2 The statistical differences in the effects of Tob, NT<sup>Tob</sup>, and NT<sup>Tob</sup>-Mal on bacterial biofilm growth. \*\*P < 0.01, \*\*\*P < 0.001, compared to Tob group. #P < 0.05, ##P < 0.01, ####P < 0.0001, compared to NT<sup>Tob</sup> group.
